# Supplementary material for: Perspectives of primary care physicians and pharmacists on interprofessional collaboration in Kuwait: A quantitative study
Source: PubMed Central journal article supplement (PMC7371165; doi:10.1371/journal.pone.0236114), 2020-07-20
Supplement: pone.0236114.s001.pdf [file pone.0236114.s001.pdf]

# Interprofessional Collaborative Practice Survey (Physicians)

## 1. Demographic Characteristics

**PLEASE FILL IN OR TICK (√) THE APPROPRIATE ANSWER**

- 1.1 Gender:                     Male       Female
- 1.2 Age (in years): .....
- 1.3 Professional experience (in years): .....

## 2. Attitudes and Experience

2.1 Please insert tick (√) in the corresponding box that that BEST fits your level of agreement with each statement

|                                                                                                                     | Strongly agree | Agree | Neutral | Disagree | Strongly disagree |
|---------------------------------------------------------------------------------------------------------------------|----------------|-------|---------|----------|-------------------|
| 1. I believe collaborative practice between physicians and other healthcare professionals improves patient outcomes |                |       |         |          |                   |
| 2. I believe collaborative practice between physicians and pharmacists improves patient outcomes                    |                |       |         |          |                   |
| 3. I would consider collaborating with pharmacists to improve patient outcomes                                      |                |       |         |          |                   |

2.2 Please insert tick (√) in the corresponding box of the statement that BEST reflects your experience with collaborative practice

|                                                                |  |
|----------------------------------------------------------------|--|
| 1. I have always collaborated with pharmacists in the past     |  |
| 2. I have frequently collaborated with pharmacists in the past |  |
| 3. I have sometimes collaborated with pharmacists in the past  |  |
| 4. I have rarely collaborated with pharmacists in the past     |  |
| 5. I have never collaborated with pharmacists in the past      |  |

### 3. Preferred Methods of Communication

Please insert tick (✓) in the corresponding box that BEST fits your level of agreement with each method of communication that would work best between you and the pharmacist for a collaborative practice in the primary care setting.

|                                                | Strongly agree | Agree | Neutral | Disagree | Strongly disagree |
|------------------------------------------------|----------------|-------|---------|----------|-------------------|
| 1. Paper                                       |                |       |         |          |                   |
| 2. Fax                                         |                |       |         |          |                   |
| 3. Telephone                                   |                |       |         |          |                   |
| 4. Face-to-Face                                |                |       |         |          |                   |
| 5. Social Media (Twitter, Facebook, Instagram) |                |       |         |          |                   |

### 4. Professional role of pharmacists

Please rank the following roles of the pharmacist in the order of their ability to significantly improve patient care, where 1 = Most important role and 8 = Least important role.

|                                                                                                                      | Rank of importance<br>1 to 8 |
|----------------------------------------------------------------------------------------------------------------------|------------------------------|
| 1. Providing drug information to physicians to assist in decision-making regarding a specific patient's drug therapy |                              |
| 2. Dispensing prescriptions                                                                                          |                              |
| 3. Providing advice to physicians regarding drug interactions                                                        |                              |
| 4. Helping to improve patient adherence                                                                              |                              |
| 5. Assisting in medication dosage adjustment                                                                         |                              |
| 6. Helping to manage side effects of drug therapy                                                                    |                              |
| 7. Patient counselling about their prescriptions                                                                     |                              |
| 8. Providing advice to physicians regarding modification of a patient's drug therapy                                 |                              |

### 5. Areas for further collaboration between physicians and pharmacists

Please insert tick (✓) in the corresponding box that BEST fits your level of agreement with each area for potential further collaboration with pharmacists to provide patient care in the primary care setting.

|                                                              | Strongly agree | Agree | Neutral | Disagree | Strongly disagree |
|--------------------------------------------------------------|----------------|-------|---------|----------|-------------------|
| 1. Patient counselling                                       |                |       |         |          |                   |
| 2. Helping in the management of side effects of drug therapy |                |       |         |          |                   |
| 3. Making recommendations to modify a patient's drug therapy |                |       |         |          |                   |
| 4. Assisting in medication dosage adjustment                 |                |       |         |          |                   |
| 5. Providing drug information to help select a medication    |                |       |         |          |                   |
| 6. Providing advice regarding drug interactions              |                |       |         |          |                   |
| 7. Helping to improve patient adherence                      |                |       |         |          |                   |

### 6. Barriers to collaborative practice between physicians and pharmacists

Please insert tick (✓) in the corresponding box that BEST fits your level of agreement with each statement as a barrier to collaborative practice in the primary care setting

|                                                                                                           | Strongly agree | Agree | Neutral | Disagree | Strongly disagree |
|-----------------------------------------------------------------------------------------------------------|----------------|-------|---------|----------|-------------------|
| 1. Lack of time                                                                                           |                |       |         |          |                   |
| 2. Lack of face-to-face communication                                                                     |                |       |         |          |                   |
| 3. Involvement of multiple health care providers resulting in fragmentation of care                       |                |       |         |          |                   |
| 4. Lack of financial compensation                                                                         |                |       |         |          |                   |
| 5. Concern regarding liability over shared patient information                                            |                |       |         |          |                   |
| 6. Concern regarding liability over shared patient responsibility                                         |                |       |         |          |                   |
| 7. Need to deal with multiple healthcare professionals                                                    |                |       |         |          |                   |
| 8. Lack of belief that collaborative practice will improve patient care                                   |                |       |         |          |                   |
| 9. Lack of confidence in the pharmacist's knowledge or skills to take their advice in patient care issues |                |       |         |          |                   |
